# Supplementary material for: Emerging investigator series: toward the ultimate limit of seawater desalination with mesopelagic open reverse osmosis
Source: Royal Society of Chemistry journal article supplement (doi:10.1039/d1ew00153a), 2021-01-01
Supplement: d1ew00153a1.pdf [file d1ew00153a1.pdf]

# **Emerging investigator series: Toward the Ultimate Limit of Seawater Desalination with Mesopelagic Open Reverse Osmosis**

Shihong Lin<sup>1,2,\*</sup> and Srinivas Veerapaneni<sup>3</sup>

1

<sup>1</sup> Department of Civil and Environmental Engineering, Vanderbilt University, Nashville,  
TN 37235-1831, United States

<sup>2</sup>Department of Chemical and Biomolecular Engineering, Vanderbilt University,  
Nashville, Tennessee 37235-1831, United States

<sup>3</sup> Black & Veatch Corp., 8400 Ward Parkway, Kansas City, MO 64114, United States

Email: [shihong.lin@vanderbilt.edu](mailto:shihong.lin@vanderbilt.edu)

## S1. Derivation of the Specific Energy Consumption (SEC) for on-ground SWRO

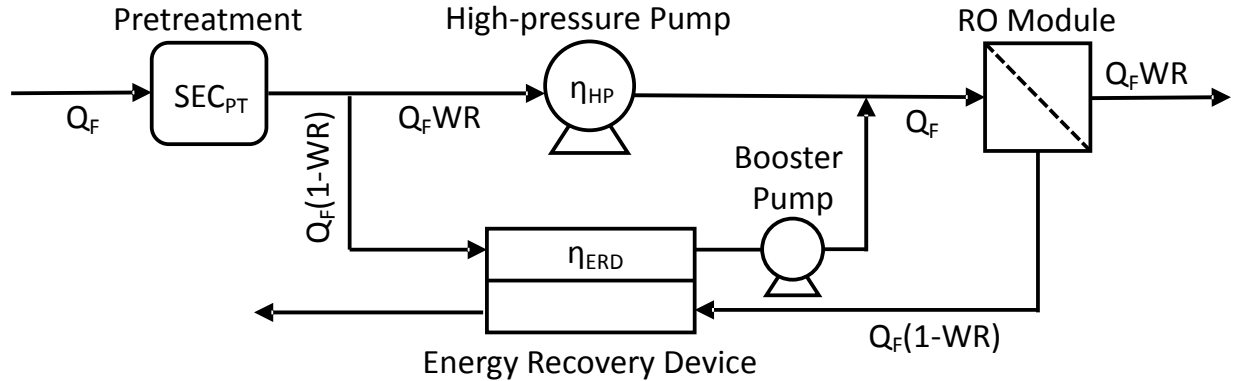

**RO Operating Pressure.** For a single-pass constant-pressure RO, the minimum applied pressure,  $\Delta p_{min}$ , is the osmotic pressure of the existing brine (as a function of  $WR$ ),  $\pi_b(WR)$ .

$$\Delta p_{min} = \pi_b(WR) = \frac{\pi_0}{1 - WR} \quad (1)$$

where  $\pi_0$  is the feed (i.e., seawater) osmotic pressure. In practice, an excess pressure (also called over-pressure),  $\Delta p_{ex}$ , is applied on top of  $\Delta p_{min}$  to (a) provide a finite driving force even at the end of the module, and (b) compensate the pressure drop due to the frictional loss along of the water flow along the feed channel. Therefore, the actual applied pressure,  $\Delta p$ , is the sum of  $\Delta p_{min}$  and  $\Delta p_{ex}$ :

$$\Delta p = \Delta p_{min} + \Delta p_{ex} = \frac{\pi_0}{1 - WR} + \Delta p_{ex} \quad (2)$$

**Power for RO.** Assuming the feed influent (volumetric) flowrate to be  $Q_F$ , the power for pressurizing the entire feed stream to acquire  $\Delta p$  is theoretically.

$$P_{RO} = \Delta p Q_F \quad (3)$$

**Power Recovered from ERD.** The flowrate of the exit brine is  $Q_F(1 - WR)$ . Such a brine stream is still pressurized at  $(1 - \varepsilon)\Delta p$  with  $\varepsilon\Delta p$  being the pressure drop in the module.

Assuming the efficiency of the energy recovery device (ERD) as  $\eta_{ERD}$ , the power that is recovered by the ERD is

$$P_{ERD} = \eta_{ERD}(1 - \varepsilon)\Delta p Q_F(1 - WR) \quad (4)$$

The exiting feed stream from the ERD has a pressure lower than the working pressure,  $\Delta p$ . Therefore, a booster pump is used to raise the pressure to  $\Delta p$ . Because the energy requirement for the booster pump is relatively small, we do not account for the inefficiency of the booster pump to simplify our analysis

**Power Loss in HP.** The ERD can only pressurize an incoming stream at the same flowrate of the brine stream. Therefore, we need to use high-pressure pumps (HP) to pressurize a stream with a flowrate of  $Q_F WR$ . Assuming that the efficiency of the HP to be  $\eta_{HP}$ , the power loss in the HP for raising the pressure to  $\Delta p$  is

$$P_{HPL} = \Delta p Q_F WR \left( \frac{1}{\eta_{HP}} - 1 \right) \quad (5)$$

where the subscript "HPL" stands for high-pressure pump loss.

**Effective Power for Pretreatment.** Because the entire feed stream undergoes pretreatment, the power consumption for pretreatment can be described as

$$P_{PT} = Q_F SEC_{PT} \quad (6)$$

where  $SEC_{PT}$  is specific energy consumption (energy per volume of feed water) for pretreatment (which can also include intake). We note that the chemical cost for pretreatment can also be included in  $SEC_{PT}$  by first converting it to monetary cost and then to energy equivalent based on the energy prize. With such a treatment,  $SEC_{PT}$  represents both the energy and chemical cost of pretreatment and  $P_{PT}$  is referred to as the effective power for pretreatment.

**Total Power.** The total power of the system (excluding post-treatment) is given by

$$P_{Tot} = P_{RO} + P_{HPL} - P_{ERD} + P_{PT} \quad (7)$$

**Total Specific Energy Consumption.** The total specific energy consumption of the process, defined as energy consumed to generate a unit volume of permeate, is given by

$$SEC_{Tot} = \frac{P_{Tot}}{Q_F WR} \quad (8)$$

Combining equations 3 to 8 yields

$$SEC_{Tot} = \frac{\Delta p(1 - \eta_{ERD}(1 - \varepsilon)(1 - WR)) + SEC_{PT}}{WR} + \Delta p \left( \frac{1}{\eta_{HHP}} - 1 \right) \quad (9)$$

Plugging equation 2 into equation 9:

$$SEC_{Tot} = \frac{1}{WR} \left[ \left( \frac{\pi_0}{1 - WR} + \Delta p_{ex} \right) \left( 1 - \eta_{ERD}(1 - \varepsilon)(1 - WR) + WR \left( \frac{1}{\eta_{HP}} - 1 \right) \right) + SEC_{PT} \right] \quad (10)$$

To simplify the equation, let us define  $\eta_{ERD}(1 - \varepsilon)$  as  $\alpha$  and  $\left( \frac{1}{\eta_{HHP}} - 1 \right)$  as  $\beta$ , equation 10 then becomes

$$SEC_{Tot} = \frac{1}{WR} \left[ \left( \frac{\pi_0}{1 - WR} + \Delta p_{ex} \right) (1 - \alpha(1 - WR) + WR \beta) + SEC_{PT} \right] \quad (11)$$

which can be simplified as

$$SEC_{Tot} = \frac{\pi_0}{WR} \left[ \left( \frac{1 + WR \beta}{1 - WR} - \alpha \right) + \frac{\Delta p_{ex}}{\pi_0} (1 + WR \beta - \alpha(1 - WR)) + \frac{SEC_{PT}}{\pi_0} \right] \quad (12)$$

The osmotic pressure of seawater,  $\pi_0$ , is roughly constant  $\sim 27$  bar. To simplify our analysis, we can also express  $\Delta p_{ex}$  and  $SEC_{PT}$  using  $\pi_0$  as the unit. Using equation 12 with the parameters specified in Table S1, we can generate the results presented in Figure 3.

**Table S1. Parameters used in assessing SEC of on-ground SWRO**

|  | Value for simulation |  | Value for simulation |
|--|----------------------|--|----------------------|
|  |                      |  |                      |

|                 |            |                                                |      |
|-----------------|------------|------------------------------------------------|------|
| $\Delta p_{ex}$ | $0.2\pi_0$ | $\varepsilon$                                  | 5%   |
| $SEC_{PT}$      | $0.8\pi_0$ | $\alpha = \eta_{ERD}(1 - \varepsilon)$         | ~90% |
| $\eta_{HP}$     | 90%        | $\beta = \left(\frac{1}{\eta_{HP}} - 1\right)$ | ~11% |
| $\eta_{ERD}$    | 95%        |                                                |      |

## S2. Derivation of Specific Energy Consumption (SEC) for MORO

First of all, the SEC for MORO can be approximated by the hydrostatic pressure of the location where the system is placed. This is because the energy required to deliver a unit volume of desalinated water to sea level is simply the hydrostatic pressure of the MORO system plus the pressure drop along the water pipe. The head loss along the water pipe,  $\Delta h$ , can be estimated using the Darcy-Weisbach equation:

$$\frac{\Delta h}{L} = f_D \frac{\rho \langle v \rangle^2}{2D} \quad (13)$$

where  $L$  is the length of the pipe and is roughly equal to the depth of the MORO system,  $f_D$  is the Darcy friction factor,  $\rho$  is the water density,  $\langle v \rangle$  is the mean flow velocity, and  $D$  is the hydraulic diameter. From equation 13, it can be calculated that the pressure drop is rather small as long as the diameter of the tube is not too small.

**Table S2.**

|                     | Case 1 | Case 2 |
|---------------------|--------|--------|
| Capacity (MGD)      | 20     | 100    |
| Tube diameter (m)   | 1      | 2      |
| Pressure drop (bar) | 0.05   | 0.03   |

$f_D=0.5$  mm;  $\rho=998.206$  kg m<sup>-3</sup>; L=300 m

Based on these calculations, the pressure drop along the water pipe is far less than 1% of the hydrostatic pressure and can thus be ignored in our analysis. Now let us consider the relationship between the flux of water permeation through the membrane,  $J$ , and hydraulic pressure difference across the RO membrane,  $\Delta P$ . Because is no salt accumulation inside a module (as open modules are used in MORO), the osmotic

pressure of the feed water (i.e., seawater) is always  $\pi_0$ . Considering concentration polarization,  $J$  as a function of  $\Delta p$  has been well established as

$$J = A \left( \Delta p - \pi_0 \exp\left(\frac{J}{k}\right) \right) \quad (14)$$

Rearranging equation 14 yields

$$\Delta p = \frac{J}{A} + \pi_0 \exp\left(\frac{J}{k}\right) \quad (15)$$

which is equation 1 in the manuscript.
